# Supplementary material for: Antibiofilm and Immune-Modulatory Activity of Cannabidiol and Cannabigerol in Oral Environments—In Vitro Study
Source: MDPI journal article supplement (doi:10.3390/antibiotics13040342), 2024-04-09
Supplement: s1 [file s1]

Table S1.

| <i>Compound</i>      |                  | <i>CBD</i>   |           |           |            |            | <i>CBG</i>   |           |           |            |            | <i>Peroxide</i> | <i>Control</i> |
|----------------------|------------------|--------------|-----------|-----------|------------|------------|--------------|-----------|-----------|------------|------------|-----------------|----------------|
| <i>Concentration</i> |                  | 0.25 $\mu$ M | 1 $\mu$ M | 3 $\mu$ M | 10 $\mu$ M | 20 $\mu$ M | 0.25 $\mu$ M | 1 $\mu$ M | 3 $\mu$ M | 10 $\mu$ M | 20 $\mu$ M | 100 $\mu$ M     |                |
| <i>Hours</i>         | <i>Parameter</i> |              |           |           |            |            |              |           |           |            |            |                 |                |
| 3                    | Mean (%)         | 97.43        | 96.97     | 96.37     | 94.33      | 94.83      | 94.8         | 91.47     | 88.7      | 95.63      | 96.13      | 0               | 96.07          |
|                      | Std. Deviation   | 0.1528       | 0.2082    | 0.05774   | 0.1528     | 0.3512     | 0.2646       | 0.2517    | 0.4583    | 0.1528     | 0.1528     | 0               | 0.2082         |
|                      | p value          | <0.0001      | 0.0009    | >0.9999   | <0.0001    | <0.0001    | <0.0001      | <0.0001   | <0.0001   | 0.3494     | >0.9999    | <0.0001         |                |
| 6                    | Mean (%)         | 95.17        | 95.1      | 96.2      | 97.33      | 97.5       | 95.67        | 95.1      | 92.9      | 97.43      | 97.83      | 0               | 94.33          |
|                      | Std. Deviation   | 0.5774       | 0.3606    | 0.2646    | 0.4163     | 0.5        | 0.2887       | 0.3606    | 0.4       | 0.3215     | 0.1528     | 0               | 0.4163         |
|                      | p value          | 0.1173       | 0.1943    | <0.0001   | <0.0001    | <0.0001    | 0.0019       | 0.1943    | 0.0008    | <0.0001    | <0.0001    | <0.0001         |                |
| 12                   | Mean (%)         | 96.5         | 95.5      | 93.73     | 96.77      | 96.4       | 87.5         | 88.9      | 84.77     | 96.5       | 96.17      | 0               | 96.2           |
|                      | Std. Deviation   | 0.2646       | 0.2646    | 0.2517    | 0.2517     | 0.2        | 0.3          | 0.2646    | 0.2517    | 0.2646     | 0.5774     | 0               | 0.2646         |
|                      | p value          | >0.9999      | 0.0742    | <0.0001   | 0.2695     | >0.9999    | <0.0001      | <0.0001   | <0.0001   | >0.9999    | >0.9999    | <0.0001         |                |
